# Supplementary material for: Context-Dependent Role of Mitochondrial Fusion-Fission in Clonal Expansion of mtDNA Mutations
Source: PubMed Central journal article supplement (PMC4440705; doi:10.1371/journal.pcbi.1004183), 2015-05-21
Supplement: pcbi.1004183.s001.pdf [file pcbi.1004183.s001.pdf]

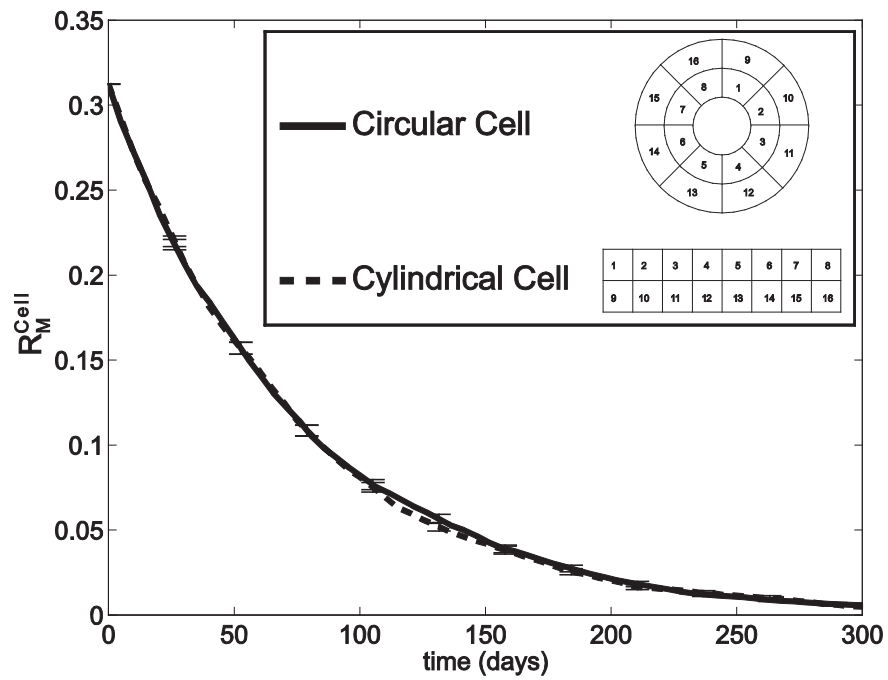

Figure S1. Comparison of model simulations using circular and cylindrical cell geometries.
