# Supplementary material for: Context-Dependent Role of Mitochondrial Fusion-Fission in Clonal Expansion of mtDNA Mutations
Source: PubMed Central journal article supplement (PMC4440705; doi:10.1371/journal.pcbi.1004183), 2015-05-21
Supplement: pcbi.1004183.s002.pdf [file pcbi.1004183.s002.pdf]

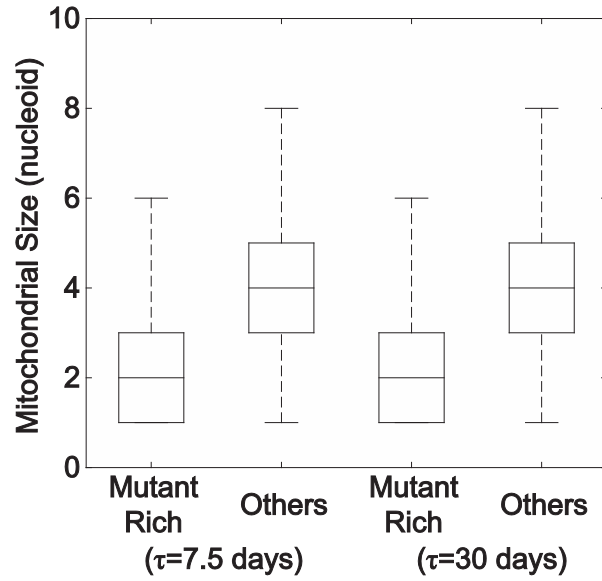

Figure S2. Comparison of mitochondrial nucleoid content between mutant-rich mitochondria (with mutant fractions >90%) and the rest of the mitochondrial population in model simulations with  $\tau = 7.5$  and 30 days.
