# Supplementary material for: Context-Dependent Role of Mitochondrial Fusion-Fission in Clonal Expansion of mtDNA Mutations
Source: PubMed Central journal article supplement (PMC4440705; doi:10.1371/journal.pcbi.1004183), 2015-05-21
Supplement: pcbi.1004183.s003.pdf [file pcbi.1004183.s003.pdf]

## Supporting Table

### Context-Dependent Role of Mitochondrial Fusion-Fission in Clonal Expansion of mtDNA Mutations

Zhi Yang Tam, Jan Gruber, Barry Halliwell, Rudiyanto Gunawan

**Table S1. Sensitivity Coefficients of Global Parametric Sensitivity Analysis**

| Parameters                                                                                              | Day 50                | Day 100               | Day 150               | Day 200               | Day 250               |
|---------------------------------------------------------------------------------------------------------|-----------------------|-----------------------|-----------------------|-----------------------|-----------------------|
| Replicative advantage ( $k_R$ )                                                                         | $4.32 \times 10^{-1}$ | $4.15 \times 10^{-1}$ | $3.99 \times 10^{-1}$ | $3.80 \times 10^{-1}$ | $3.59 \times 10^{-1}$ |
| Mitophagy selectivity strength ( $r_{D,max}$ )                                                          | $2.33 \times 10^{-1}$ | $2.27 \times 10^{-1}$ | $2.23 \times 10^{-1}$ | $2.18 \times 10^{-1}$ | $2.12 \times 10^{-1}$ |
| Fusion selectivity strength ( $r_{fusion,max}$ )                                                        | $1.24 \times 10^{-1}$ | $1.27 \times 10^{-1}$ | $1.22 \times 10^{-1}$ | $1.16 \times 10^{-1}$ | $1.08 \times 10^{-1}$ |
| Selectivity threshold ( $K_D$ ) (Mitophagy)                                                             | $7.03 \times 10^{-2}$ | $7.45 \times 10^{-2}$ | $7.32 \times 10^{-2}$ | $7.13 \times 10^{-2}$ | $6.91 \times 10^{-2}$ |
| Replicative advantage ( $k_R$ ) + Mitophagy selectivity strength ( $r_{D,max}$ )                        | 0                     | $1.24 \times 10^{-2}$ | $2.06 \times 10^{-2}$ | $3.06 \times 10^{-2}$ | $4.35 \times 10^{-2}$ |
| Mixing time constant ( $\tau$ )                                                                         | $2.19 \times 10^{-2}$ | $3.16 \times 10^{-2}$ | $3.56 \times 10^{-2}$ | $3.82 \times 10^{-2}$ | $3.93 \times 10^{-2}$ |
| Replicative advantage ( $k_R$ ) + Mixing time constant ( $\tau$ )                                       | 0                     | $1.08 \times 10^{-2}$ | $1.2 \times 10^{-2}$  | $1.39 \times 10^{-2}$ | $1.59 \times 10^{-2}$ |
| Replicative advantage ( $k_R$ ) + Fusion selectivity strength ( $r_{fusion,max}$ )                      | 0                     | 0                     | $2.93 \times 10^{-3}$ | $9.07 \times 10^{-3}$ | $1.54 \times 10^{-2}$ |
| Mitophagy selectivity strength ( $r_{D,max}$ ) + Selectivity threshold ( $K_D$ ) (Retrograde signaling) | 0                     | 0                     | 0                     | 0                     | $2.05 \times 10^{-2}$ |
| Replicative advantage ( $k_R$ ) + Mitophagy rate constant ( $k_D$ )                                     | $4.37 \times 10^{-2}$ | $2.79 \times 10^{-2}$ | $2.17 \times 10^{-2}$ | $1.8 \times 10^{-2}$  | $1.51 \times 10^{-2}$ |
| Fusion selectivity strength ( $r_{fusion,max}$ ) + Retrograde signaling strength ( $r_{R,max}$ )        | 0                     | 0                     | 0                     | 0                     | $6.34 \times 10^{-3}$ |
| Replicative advantage ( $k_R$ ) + Selectivity threshold ( $K_D$ ) (Mitophagy)                           | 0                     | 0                     | $1.3 \times 10^{-3}$  | $4.7 \times 10^{-3}$  | $8.55 \times 10^{-3}$ |
| Mitophagy selectivity strength ( $r_{D,max}$ ) + Fusion selectivity strength ( $r_{fusion,max}$ )       | 0                     | 0                     | 0                     | 0                     | 0                     |
| Mitophagy rate constant ( $k_D$ ) + Selectivity threshold ( $K_D$ ) (Mitophagy)                         | $4.01 \times 10^{-2}$ | $2.21 \times 10^{-2}$ | $1.64 \times 10^{-2}$ | $1.37 \times 10^{-2}$ | $1.2 \times 10^{-2}$  |
| Mitophagy rate constant ( $k_D$ ) + Fusion selectivity strength ( $r_{fusion,max}$ )                    | 0                     | 0                     | $2.07 \times 10^{-2}$ | $1.55 \times 10^{-2}$ | $1.25 \times 10^{-2}$ |
| Selectivity threshold ( $K_D$ ) (Fusion)                                                                | $9.71 \times 10^{-3}$ | $1.09 \times 10^{-2}$ | $1.1 \times 10^{-2}$  | $1.07 \times 10^{-2}$ | $1.03 \times 10^{-2}$ |
| Mixing time constant ( $\tau$ ) + Mitophagy selectivity strength ( $r_{D,max}$ )                        | 0                     | $9.43 \times 10^{-5}$ | $1.04 \times 10^{-3}$ | $2.47 \times 10^{-3}$ | $6.07 \times 10^{-3}$ |
| Mitophagy selectivity threshold ( $K_D$ ) + Selectivity threshold ( $K_D$ ) (Fusion)                    | 0                     | 0                     | 0                     | $1.06 \times 10^{-2}$ | $8.49 \times 10^{-3}$ |
| Mitophagy rate constant ( $k_D$ ) + Mitophagy selectivity strength ( $r_{D,max}$ )                      | $4.43 \times 10^{-3}$ | $6.51 \times 10^{-3}$ | $7.21 \times 10^{-3}$ | $7.35 \times 10^{-3}$ | $7.34 \times 10^{-3}$ |
| Selectivity threshold ( $K_D$ ) (Retrograde signaling)                                                  | 0                     | $4.45 \times 10^{-3}$ | $4.46 \times 10^{-3}$ | $5.7 \times 10^{-3}$  | $5.98 \times 10^{-3}$ |
| Mixing time constant ( $\tau$ ) + Selectivity threshold ( $K_D$ ) (Fusion)                              | 0                     | $1.88 \times 10^{-2}$ | $1.16 \times 10^{-2}$ | $8.5 \times 10^{-3}$  | $6.78 \times 10^{-3}$ |
| Mixing time constant ( $\tau$ ) + Selectivity threshold ( $K_D$ ) (Mitophagy)                           | 0                     | $2.91 \times 10^{-3}$ | $2.49 \times 10^{-3}$ | $2.93 \times 10^{-3}$ | $3.52 \times 10^{-3}$ |
| Mixing time constant ( $\tau$ ) + Retrograde signaling strength ( $r_{R,max}$ )                         | 0                     | 0                     | 0                     | 0                     | $5.18 \times 10^{-3}$ |
